# Supplementary material
Source: Springer Nature journal article supplement (https://www.springermedizin.de/resource/supplementary/12993_2007_113_MOESM3_ESM.pdf/9617102)

HEDONIC DECISION

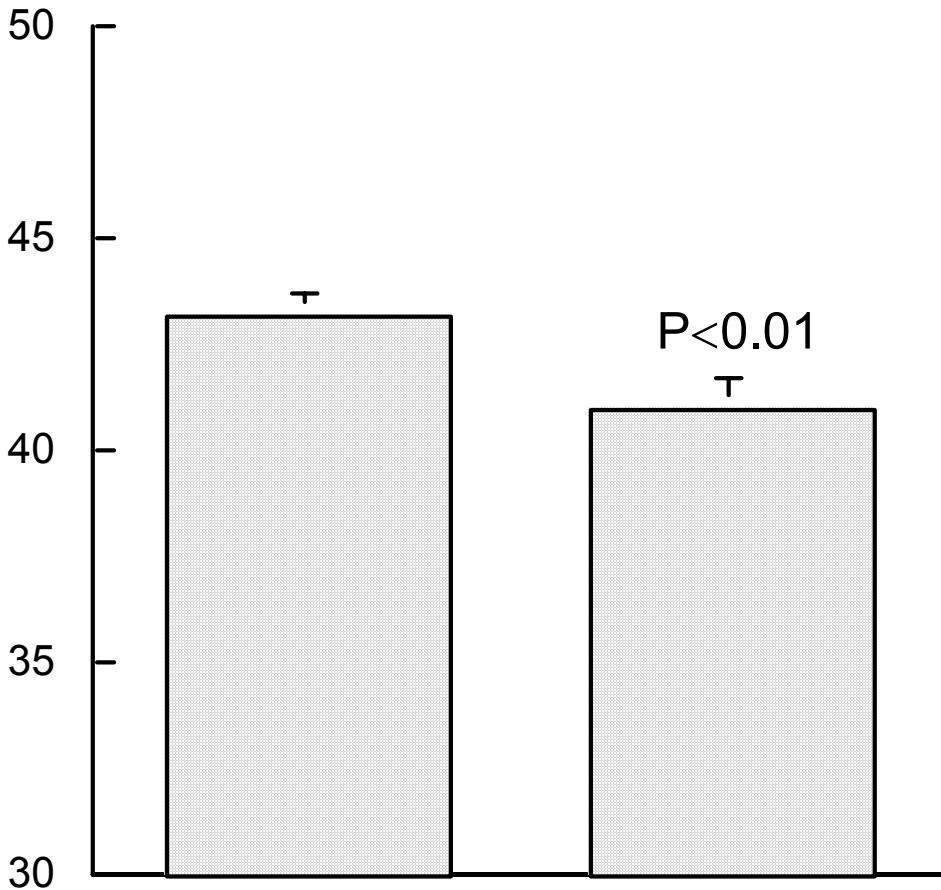

Control

Rational

INSTRUCTIONS TO PARTICIPANTS

Supplement: MOESM3 [file 9617102]
